# Supplementary material
Source: publisher site journal article supplement (https://www.dovepress.com/get_supplementary_file.php?f=233808.docx)
Supplement: Supplementary file 1 [file get_supplementary_file.php]

**Table (S1): Antibiotics susceptibility profile of *Pseudomonas aeruginosa* with different anti pseudomonas drugs:**

| **Antibiotics** | **No. tested** | **No. (%)** | | |
| --- | --- | --- | --- | --- |
| **Sensitive** | **Intermediate** | **Resistant** |
| **Cefepime** | 634 | 330 (52) | 22 (3.5) | 282 (44.5) |
| **Ceftazidime** | 634 | 302 (47.6) | 16 (2.5) | 316 (49.9) |
| **Colistin** | 634 | 206 (32.5) | 8 (1.3) | 420 (66.2) |
| **Imipenem** | 634 | 602(95) | - | 32 (5) |
| **Meropenem** | 634 | 601 (57) | 4 (0.6) | 29 (4.6) |
| **Aztreonam** | 634 | 220 | 9 (1.4) | 405 (63.8) |
| **amoxicillin–clavulanic** | 634 | 145 (22.9) | 22 (3.5) | 467 (73.7) |
| **ampicillin–sulbactam** | 634 | 153 (24.1) | 14 (2.2) | 467 (73.7) |
| **Ciprofloxacin** | 634 | 220 (34.7) | 18 (2.8) | 396 (62.5) |
| **levofloxacin** | 634 | 215 (33.9) | 20 (3.2) | 399 (62.9) |
| **Amikacin** | 634 | 190 (30) | 7 (1.1) | 437 (68.9) |
| **Gentamicin** | 634 | 181 (28.5) | 10 (1.6) | 443 (70) |

Antimicrobial susceptibility was determined by Kurby–Bauer disk diffusion test and results were evaluated according to Clinical and Laboratory Standards Institute cri-teria. The following antimicrobial disks (Oxoid,Basinstoke, UK) were used:, ciprofloxacin (5 μg), ampicillin–sulbactam (20 μg), levofloxacin (5μg), cefepime (30 μg), meropenem (10 μg), aztreonam (30μg), imipenem (10 μg), colistin sulfate (10 μg), ,ceftazidime (30 μg), amoxicillin–clavulanic (20/10 μg), amikacin (30 μg) and gentamicin (10μg)

| Isolate No | *mex*A (2 Folds) | *mex*C (2 Folds) | *mex*E (10 Folds) | *mex*Y (4 Folds) | *oprD*  *(<0.4)* |
| --- | --- | --- | --- | --- | --- |
| 1 | 0.01643597 | 0.01232729 | 0.00027 | 1.20246925 | 0.537002236 |
| 2 | 0.00019941 | 10.7853419 | 0.00139 | 3.6216748 | 1.074004472 |
| 3 | 0.09699136 | 8.01665284 | 0.00054 | 45.4749454 | 0.759435845 |
| 4 | 0.04103504 | 0.94147846 | 0.00286 | 89.884472 | 0.501040803 |
| 5 | 3.34962595 | 5.44525647 | 0.00021 | 177.909532 | 0.406971593 |
| 6 | 0.0105034 | 99.1815592 | 0.00253 | 107.485631 | 0.708578698 |
| 7 | 1.62337916 | 58.7289525 | 0.12491 | 221.782235 | 0.436181353 |
| 8 | 0.3031282 | 42.4906028 | 0.00280 | 0.85618828 | 0.575544746 |
| 9 | 4.24863675 | 3.23776887 | 16.06707 | 40.1965562 | 0.860352631 |
| 10 | 0.01955932 | 14.9396237 | 0.00507 | 2.57041267 | 1.23370717 |
| 11 | 0.16666233 | 6.97890165 | 0.01709 | 4.62034314 | 0.501040803 |
| 12 | 0.37293601 | 20.0565283 | 0.03470 | 20.39297 | 0.759435845 |
| 13 | 0.36248671 | 26.6857934 | 0.00896 | 15.5840683 | 0.575544746 |
| 14 | 0.08705072 | 0.01784916 | 21.35300 | 0.03952749 | 0.813943185 |
| 15 | 13.547925 | 182.784509 | 0.00000 | 3.05251842 | 0.501040803 |
| 16 | 0.01082117 | 86.1717938 | 20.48802 | 1.20246925 | 0.813943185 |
| 17 | 1.39088197 | 49.5220798 | 0.21037 | 0.11916232 | 0.501040803 |
| 18 | 0.24165152 | 0.35502684 | 0.00454 | 0.38904259 | 0.529609167 |
| 19 | 6.59329668 | 8.79692919 | 20.86337 | 105.785641 | 0.728499557 |
| 20 | 3.67310465 | 2.85402901 | 0.42193 | 5.70410287 | 0.845572287 |
| 21 | 0.00697302 | 0.13688156 | 33.98909 | 311.913028 | 0.986232704 |
| 22 | 7.47461878 | 15.4771927 | 0.00004 | 52.0201985 | 1.456999114 |
| 23 | 0.04468703 | 34.2509454 | 0.00226 | 236.877934 | 1.059952783 |
| 24 | 0.00331908 | 0.00312918 | 0.00451 | 209.103283 | 1.151089491 |
| 25 | 0.82927821 | 29.2020956 | 0.00046 | 20.39297 | 1.322254605 |
| 26 | 0.05779145 | 39.1264389 | 0.00001 | 305.642213 | 1.273677475 |
| 27 | 0.57954798 | 20.9372491 | 0.00855 | 58.1214987 | 0.860352631 |
| 28 | 0.02843871 | 9.29851286 | 0.00001 | 0.15789091 | 0.786217292 |
| 29 | 0.03884843 | 12.0169594 | 0.00033 | 3.69352924 | 0.853226098 |
| 30 | 2.04192248 | 58.1214987 | 12.00933 | 85.8056059 | 0.537002236 |
| 31 | 0.07002433 | 4.40456639 | 0.00055 | 7.939235 | 0.682546859 |
| 32 | 0.12191943 | 1.31638736 | 0.00056 | 0.08894147 | 0.562919293 |

**Table S2: Expression of Different efflux Pumps and oprD by P. aeruginosa isolates (Fold-Increase):**
